# Supplementary material for: The quality of patients’ self-blood pressure measurements: a cross-sectional study
Source: PubMed Central journal article supplement (PMC8588592; doi:10.1186/s12872-021-02351-5), 2021-11-12
Supplement: 12872_2021_2351_MOESM1_ESM.pdf [file 12872_2021_2351_MOESM1_ESM.pdf]

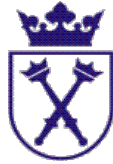

***The Quality of Patients' Self-Blood Pressure Measurements.***

1. **Gender** Female/ Male/ Prefer not to disclose
2. **Age**..... years
3. **Education:**
  - elementary school     secondary school     high education
4. **Place of living:**
  - Village or town of less than 50,000 inhabitant
  - City of more than 50,000 inhabitants
5. **Time of hypertension diagnosis (years)**
6. **Family history of hypertension YES/NO**
  - parent     both parents     siblings     children
7. **Recommended hypertension medications are taken:**
  - at all     regularly     irregularly
8. **Chronic comorbidities:**
  - diabetes     orthostatic hypotension
  - arrhythmia (eg. Atrial fibrillation)     renal insufficiency
  - other comorbidities– what kind? .....
9. **Sources of information** (more than one answer possible)
  - primary care doctor     patient is a medical staff
  - cardiologist     internet
  - other specialist     sphygmomanometer user manual
  - nurse     family/friends with hypertension
  - pharmacist     family/friends without hypertension     no source
10. **How were the instruction given on how to measure the blood pressure?** (more than one answer possible)
  - oral     written     live demonstration     no instruction
